# Supplementary material
Source: PubMed Central journal article supplement (PMC4094133)
Supplement: NIHMS575672-supplement-Supp_data.pdf [file NIHMS575672-supplement-Supp_data.pdf]

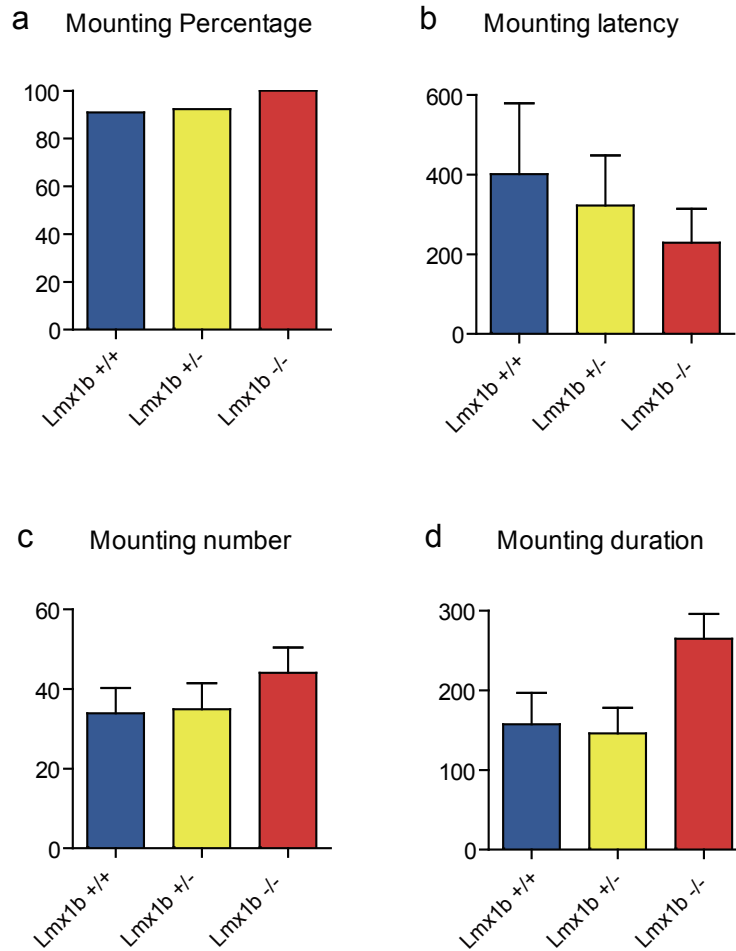

**Supplementary Figure 1 | Mounting of wt target female mice by male mice.**

When a test male was presented with an estrous female, there was no statistically significant difference among *Lmx1b*<sup>+/+</sup> (n=11) *Lmx1b*<sup>+/-</sup> (n=13) and *Lmx1b*<sup>-/-</sup> (n=11) males in mounting percentage (**a**,  $p > 0.5$ ,  $X^2$  test), the latency (**b**,  $p > 0.5$ , one-way ANOVA), frequency (**c**,  $p > 0.5$  one-way ANOVA) or duration (**d**,  $p > 0.5$ , one-way ANOVA).

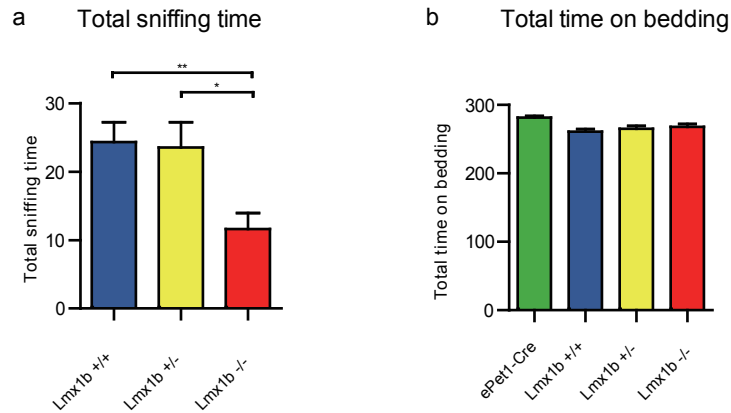

**Supplementary Figure 2 | Total sniffing time and total time on bedding.** Data from the same experiments as those shown in Fig. 3. In **a**,  $n=16$  for *Lmx1b*<sup>+/+</sup>,  $n=12$  for *Lmx1b*<sup>+/-</sup>,  $n=16$  for *Lmx1b*<sup>-/-</sup>. In **b**,  $n=9$  for *ePet1-Cre*,  $n=16$  for *Lmx1b*<sup>+/+</sup>,  $n=8$  for *Lmx1b*<sup>+/-</sup> and  $n=17$  for *Lmx1b*<sup>-/-</sup>. **a**, Total sniffing time shows the time (in seconds) of a male mouse spent on sniffing the slide (either the female genital odor side or the male genital odor side) within 3 mins. Total sniffing time was less in *Lmx1b*<sup>-/-</sup> males than in *Lmx1b*<sup>+/+</sup> and *Lmx1b*<sup>+/-</sup> males ( $p<0.01$  for *Lmx1b*<sup>+/+</sup> vs. *Lmx1b*<sup>-/-</sup>,  $p<0.05$  for *Lmx1b*<sup>+/-</sup> vs. *Lmx1b*<sup>-/-</sup>,  $p>0.05$  for *Lmx1b*<sup>+/+</sup> vs. *Lmx1b*<sup>+/-</sup>, one-way ANOVA). **b**, Four groups spent a similar amount of total time on male and female bedding ( $p>0.05$  for all pair-wise comparisons, one-way ANOVA).

**a** Innate attractive odorant response
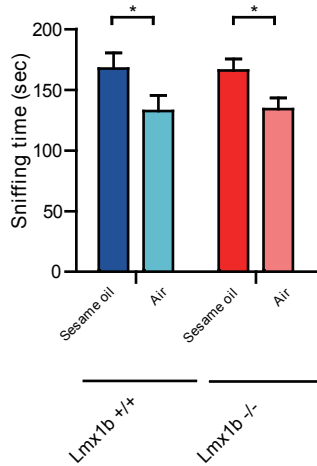
**b** Innate avoidance odorant response
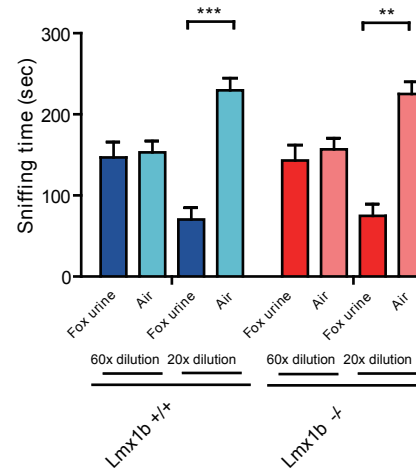
**c** Social approach
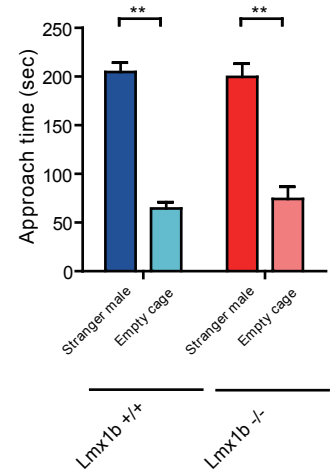

**Supplementary Figure 3 | Odor discrimination.** **a**, *Lmx1b*<sup>+/+</sup> and *Lmx1b*<sup>-/-</sup> males preferred sesame oil over air ( $p < 0.05$ , t test;  $n = 18$  for *Lmx1b*<sup>+/+</sup>,  $n = 14$  for *Lmx1b*<sup>-/-</sup>). **b**, *Lmx1b*<sup>+/+</sup> and *Lmx1b*<sup>-/-</sup> males were similar in preferring air over fox urine when the concentration of fox urine was high (20X dilution of original urine). \*\*\* indicates  $p < 0.001$  and \*\* indicates  $p < 0.01$ , t test.  $n = 11$  for *Lmx1b*<sup>+/+</sup>,  $n = 10$  for *Lmx1b*<sup>-/-</sup>. **c**, Both *Lmx1b*<sup>+/+</sup> and *Lmx1b*<sup>-/-</sup> males spent more time in the arm with a caged C57 male than in the empty arm ( $p < 0.01$ , t test;  $n = 13$  for *Lmx1b*<sup>+/+</sup>,  $n = 15$  for *Lmx1b*<sup>-/-</sup>). No difference was detected between *Lmx1b*<sup>+/+</sup> and *Lmx1b*<sup>-/-</sup> males ( $p > 0.05$  for all other pair-wise comparisons, t test).

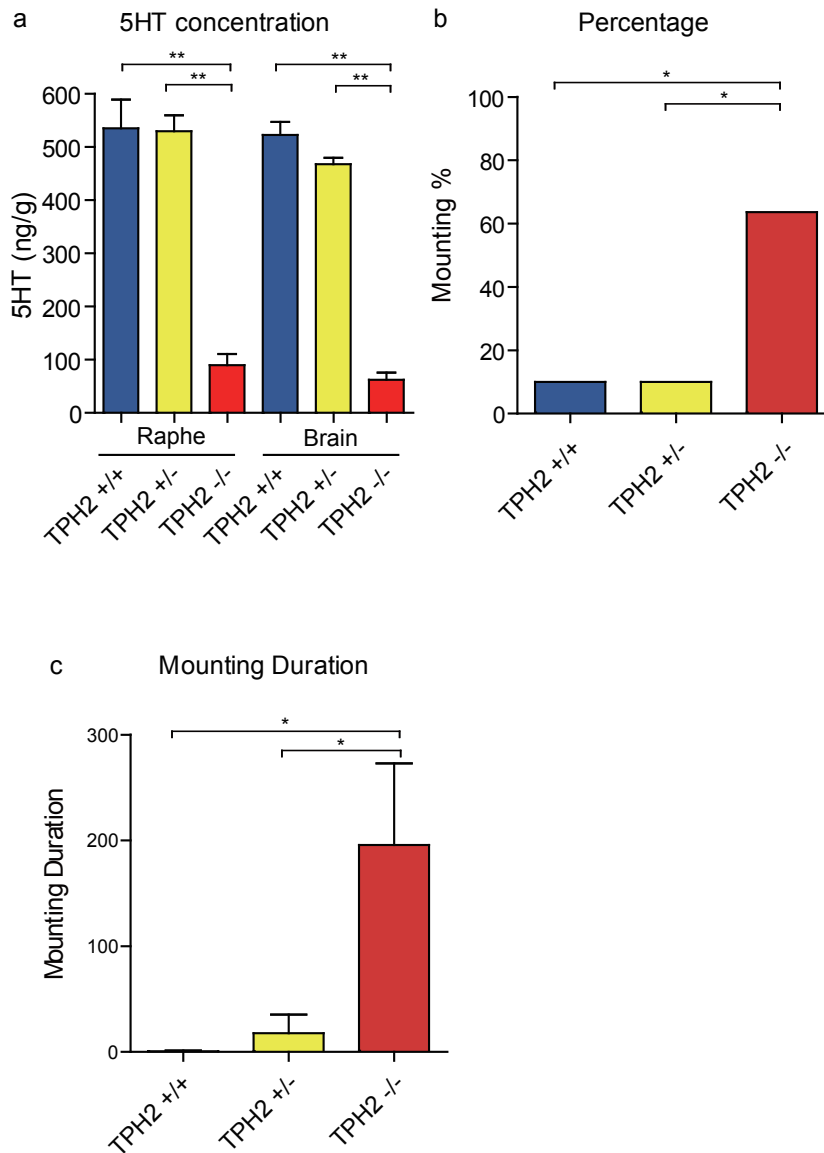

**Supplementary Figure 4 | Brain chemistry and behaviors of *Tph2* knockout males.** **a**, Amounts of 5-HT in either the raphe or the whole brain minus the raphe (abbreviated as “brain”) in *Tph2*<sup>+/+</sup> (n=7), *Tph2*<sup>+/-</sup> (n=9) and *Tph2*<sup>-/-</sup> (n=7) mice were analyzed by HPLC. 5-HT level was significantly reduced in both the raphe and the brain of *Tph2*<sup>-/-</sup> mice. **b-c**, Male-male mounting behavior of *Tph2*<sup>+/+</sup> (n=10), *Tph2*<sup>+/-</sup> (n=10) and *Tph2*<sup>-/-</sup> (n=11) mice. Compared with *Tph2*<sup>+/+</sup> and *Tph2*<sup>+/-</sup>, *Tph2*<sup>-/-</sup> males showed a higher percentage (p<0.05, X<sup>2</sup> test), and longer duration (p<0.05 for *Tph2*<sup>+/+</sup> vs. *Tph2*<sup>-/-</sup>, p<0.05 for *Tph2*<sup>+/-</sup> vs. *Tph2*<sup>-/-</sup> one-way ANOVA) in mounting males.

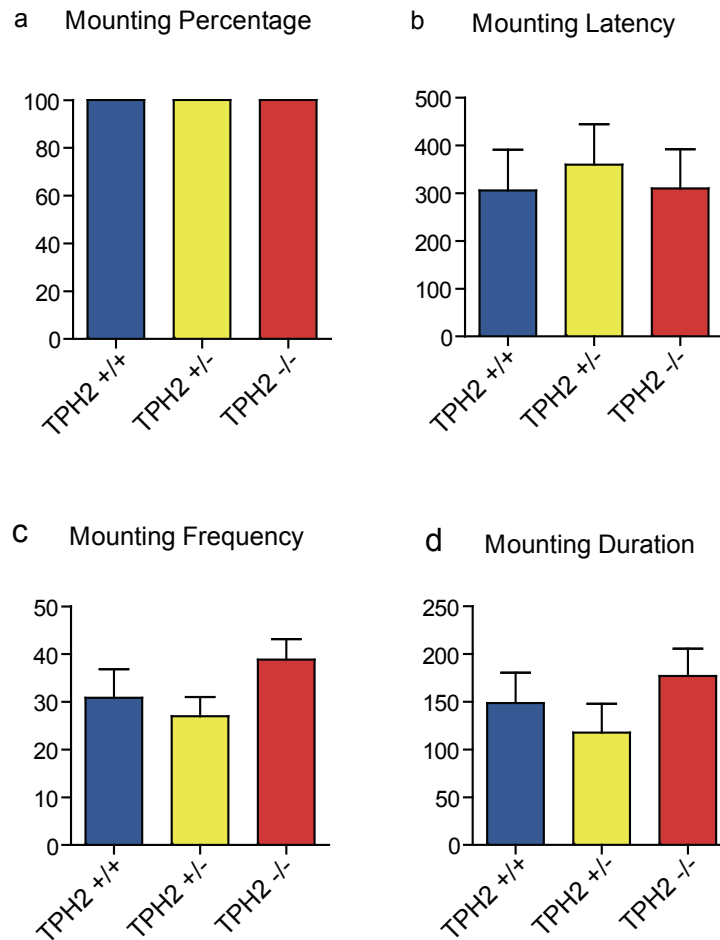

**Supplementary Figure 5 | Mounting of female target mice by *Tph2* knockout males.** When a test male was presented with an estrous female, there was no statistically difference among *Tph2*<sup>+/+</sup>, *Tph2*<sup>+/-</sup> and *Tph2*<sup>-/-</sup> males in mounting percentage (**a**,  $p > 0.5$ ,  $X^2$  test), latency (**b**,  $p > 0.5$ , one-way ANOVA), frequency (**c**,  $p > 0.5$ , one-way ANOVA), or duration (**d**,  $p > 0.5$ , one-way ANOVA) of mount.  $n = 13$  for *Tph2*<sup>+/+</sup>,  $n = 14$  for *Tph2*<sup>+/-</sup>,  $n = 16$  for *Tph2*<sup>-/-</sup>.

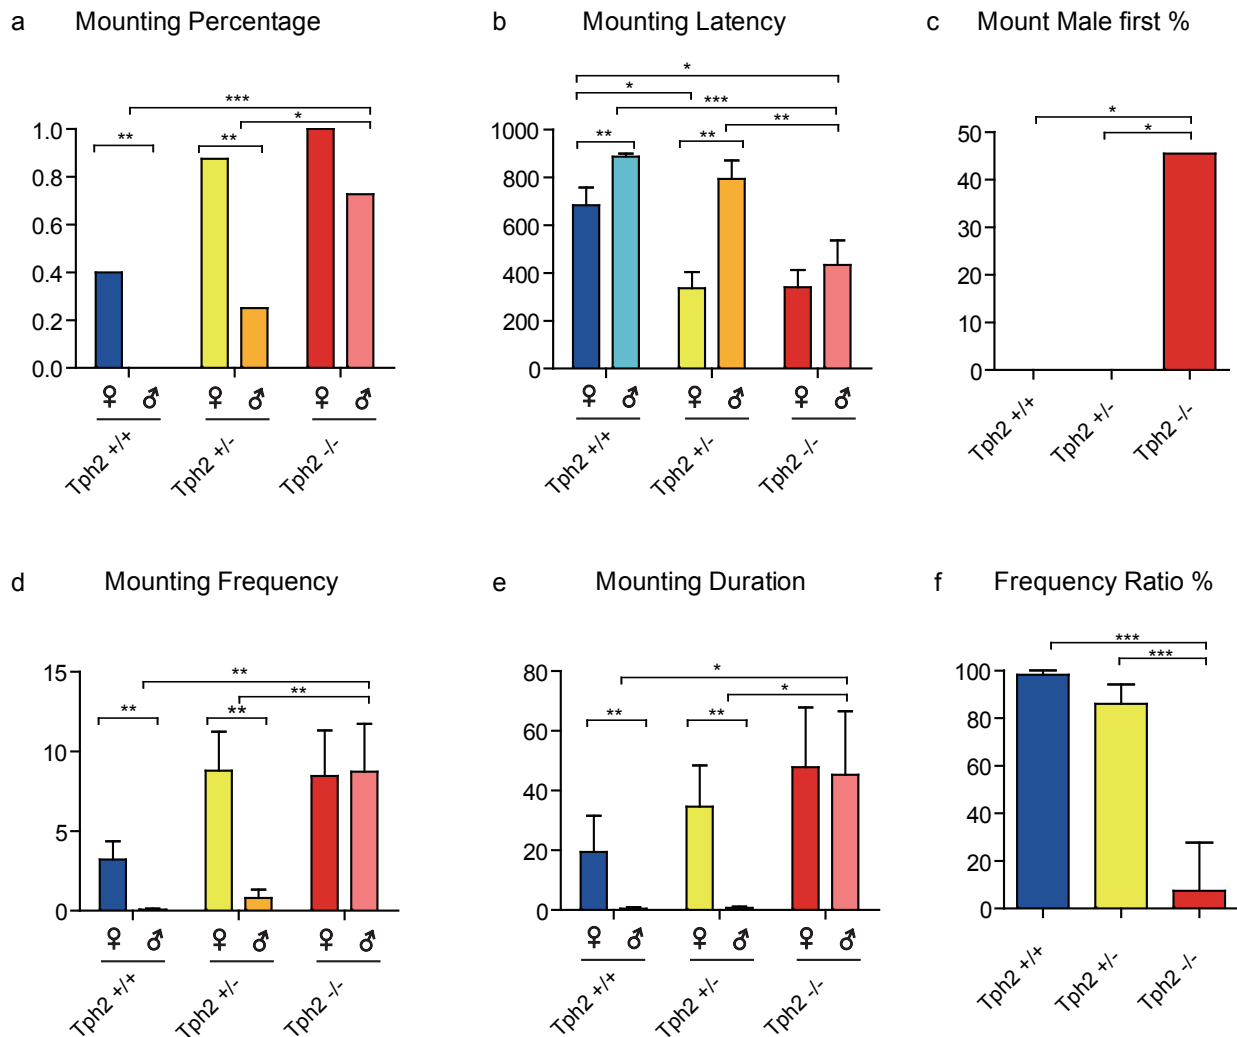

**Supplementary Figure 6 | Mounting preference by *Tph2* knockout mice.** Each test male was presented with two adult mice, one male and one estrous female, and its mating choice was analyzed for 15 mins. **a**, A higher percentage of *Tph2*<sup>+/+</sup> mice mounted female than male targets ( $n=14$ ,  $p<0.01$ ,  $X^2$  test) as did *Tph2*<sup>+/-</sup> males ( $n=10$ ,  $p<0.01$ ,  $X^2$  test). A similar percentage of *Tph2*<sup>-/-</sup> males mounted females and males ( $n=11$ ,  $p>0.05$ ,  $X^2$  test). More *Tph2*<sup>-/-</sup> mounted males than *Tph2*<sup>+/+</sup> mice ( $p<0.001$ ,  $X^2$  test) and *Tph2*<sup>+/-</sup> mice ( $p<0.5$ ,  $X^2$  test). **b**, *Tph2*<sup>+/+</sup> males mounted female targets faster than male targets ( $p<0.01$ ,  $t$  test), as did *Tph2*<sup>+/-</sup> males ( $p<0.01$ ,  $t$  test). Mounting latencies of *Tph2*<sup>-/-</sup> males for females and males were not significantly different ( $p>0.05$ ,  $t$  test). **c**, More than 40% *Tph2*<sup>-/-</sup> males, but none of the *Tph2*<sup>+/+</sup> or *Tph2*<sup>+/-</sup> males, chose the male as their first mounting targets. ( $p<0.05$  for *Tph2*<sup>+/+</sup> vs. *Tph2*<sup>-/-</sup>;  $p<0.05$  for *Tph2*<sup>+/-</sup> vs. *Tph2*<sup>-/-</sup>,  $p>0.05$  for *Tph2*<sup>+/+</sup> vs. *Tph2*<sup>+/-</sup>,  $X^2$  test). **d**, *Tph2*<sup>+/+</sup> males mounted females significantly more often than males ( $p<0.01$ ,  $t$  test),

as did *Tph2*<sup>+/-</sup> males ( $p < 0.05$ , t test). *Tph2*<sup>-/-</sup> males mounted females as often as males ( $p > 0.05$ , t test). *Tph2*<sup>-/-</sup> males mounted males more than *Tph2*<sup>+/+</sup> ( $p < 0.01$ , one-way ANOVA) and *Tph2*<sup>+/-</sup> ( $p < 0.01$ , one-way ANOVA). **e**, *Tph2*<sup>+/+</sup> males spent longer time mounting females than males ( $p < 0.01$ , t test) as did *Tph2*<sup>+/-</sup> males ( $p < 0.01$ , t test). *Tph2*<sup>-/-</sup> males did not show difference in duration of mounting males or females ( $p > 0.05$ , t test). *Tph2*<sup>-/-</sup> males spent more time mounting males than *Tph2*<sup>+/+</sup> ( $p < 0.05$ , one-way ANOVA) and *Tph2*<sup>+/-</sup> ( $p < 0.05$ , one-way ANOVA). **f**. The mounting ratio of *Tph2*<sup>-/-</sup> was significantly different from *Tph2*<sup>+/+</sup> and *Tph2*<sup>+/-</sup> ( $p < 0.001$ , one-way ANOVA).

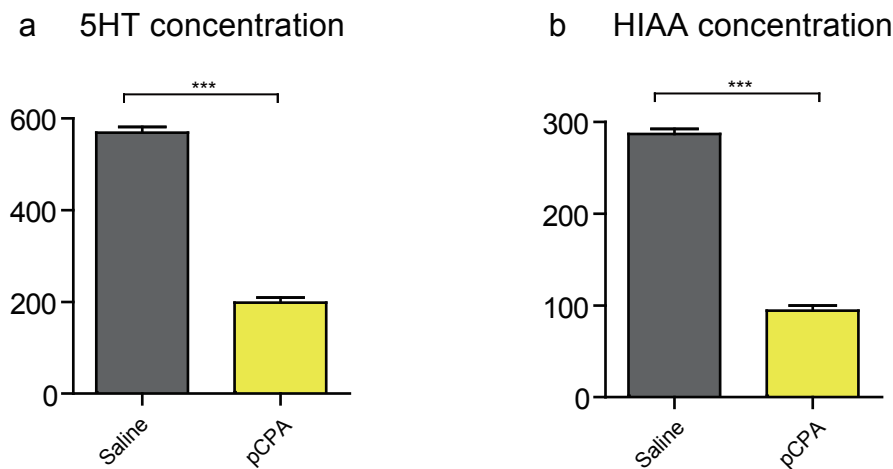

**Supplementary Figure 7 | Levels of 5-HT analyzed by HPLC. a**, 5-HT level was reduced in pCPA treated mice than the control mice in the whole brain ( $p < 0.001$ , t test). **b**, The HIAA level also reduced in pCPA treated mice than the control treated mice in the whole brain ( $p < 0.001$ , t test).  $n = 8$  for pCPA treated mice,  $n = 8$  for control mice.

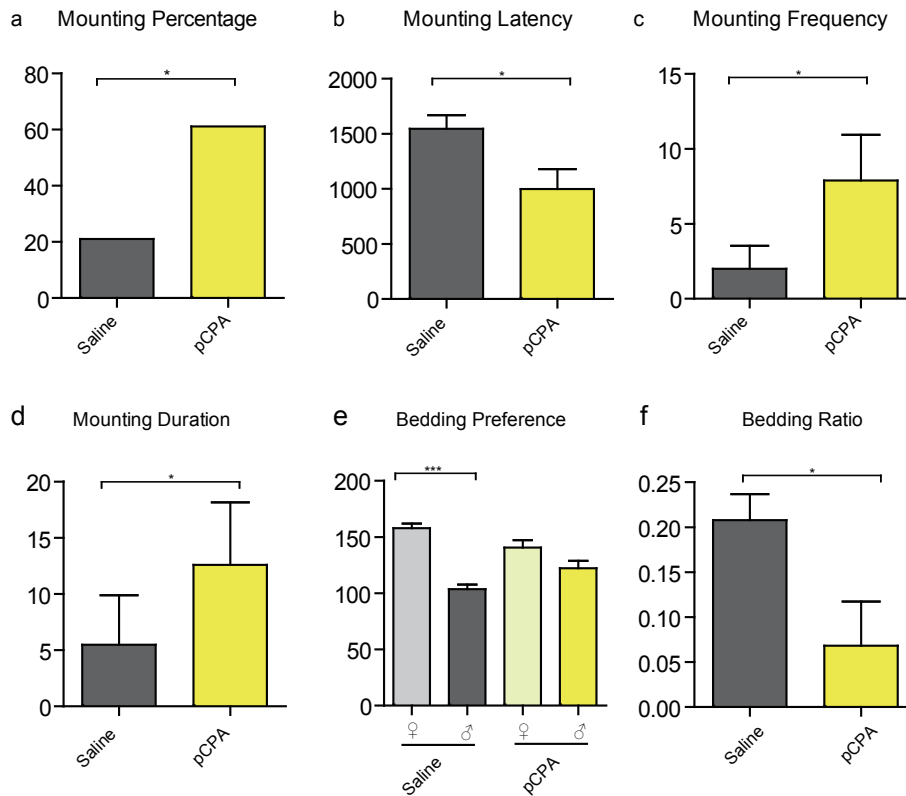

### Supplementary Figure 8 | Effect of 5-HT depletion by pCPA on adult behaviors.

Male C57 males treated with pCPA or saline in adulthood were tested for sexual behaviors. **a-d** ( $n=18$  for pCPA and  $n=19$  for control males). Mice treated with pCPA showed male-male mounting, with a higher percentage (**a**,  $p<0.5$ ,  $X^2$  test), shorter latency (**b**,  $p<0.05$ ,  $t$  test), higher frequency (**c**,  $p<0.05$ ,  $t$  test) and longer duration (**d**,  $p<0.05$ ,  $t$  test) than control mice. **e**, Computer analysis of bedding preference. The total time spent above both male and female bedding was not different between pCPA treated and control males ( $p>0.05$ ,  $t$  test). Control males spent more time above female bedding than male bedding ( $p<0.001$ ,  $t$  test). pCPA treated males showed no difference between female and male bedding ( $p>0.05$ ,  $t$  test). **f**, The bedding preference ratio of pCPA males were significantly different from the control males ( $p<0.05$ ,  $t$  test).  $n=36$  for saline group,  $n=36$  for pCPA group.



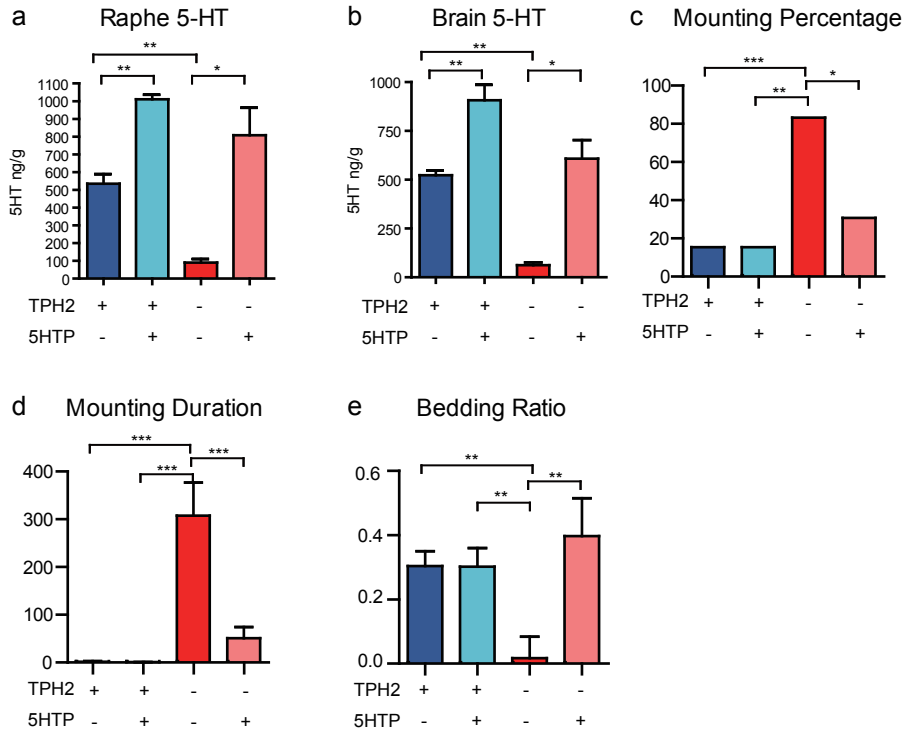

**Supplementary Figure 9 | 5-HTP rescue of chemical and behavioral deficits in *Tph2* knockout mice.** **a-b**, Levels of 5-HT were analyzed in *Tph2*<sup>+/+</sup> and *Tph2*<sup>-/-</sup> males 35 min after injection of either 5-HTP (40 mg/kg body weight) or control saline (n=5 for *Tph2*<sup>+/+</sup> with saline, n=5 for *Tph2*<sup>-/-</sup> with saline, n=5 for *Tph2*<sup>+/+</sup> with 5-HTP, and n=6 for *Tph2*<sup>-/-</sup> with 5-HTP). 5-HTP could significantly rescue the levels of 5-HT. 5-HTP could also increase the levels of 5-HT and in the wt. **c-d**, Male-male mounting in *Tph2*<sup>-/-</sup> mice was significantly rescued by 5-HTP (results from the same experiments as those in Fig. 6b and c): the mounting percentage was decreased (p<0.05) and duration shortened (p<0.001). The mounting percentage of *Tph2*<sup>-/-</sup> mice with 5-HTP injection was not significantly different from those of *Tph2*<sup>+/+</sup>. The mounting duration of *Tph2*<sup>-/-</sup> mice with 5-HTP injection was not significantly different from those of *Tph2*<sup>+/+</sup> (with saline or with 5-HTP, p>0.1). **e**, Bedding preference was monitored between 35 and 40 min after injection. Although 5-HTP could further increase 5-HT level in *Tph2*<sup>+/+</sup> mice, it did not cause statistically significant changes in bedding preference of *Tph2*<sup>+/+</sup> males.

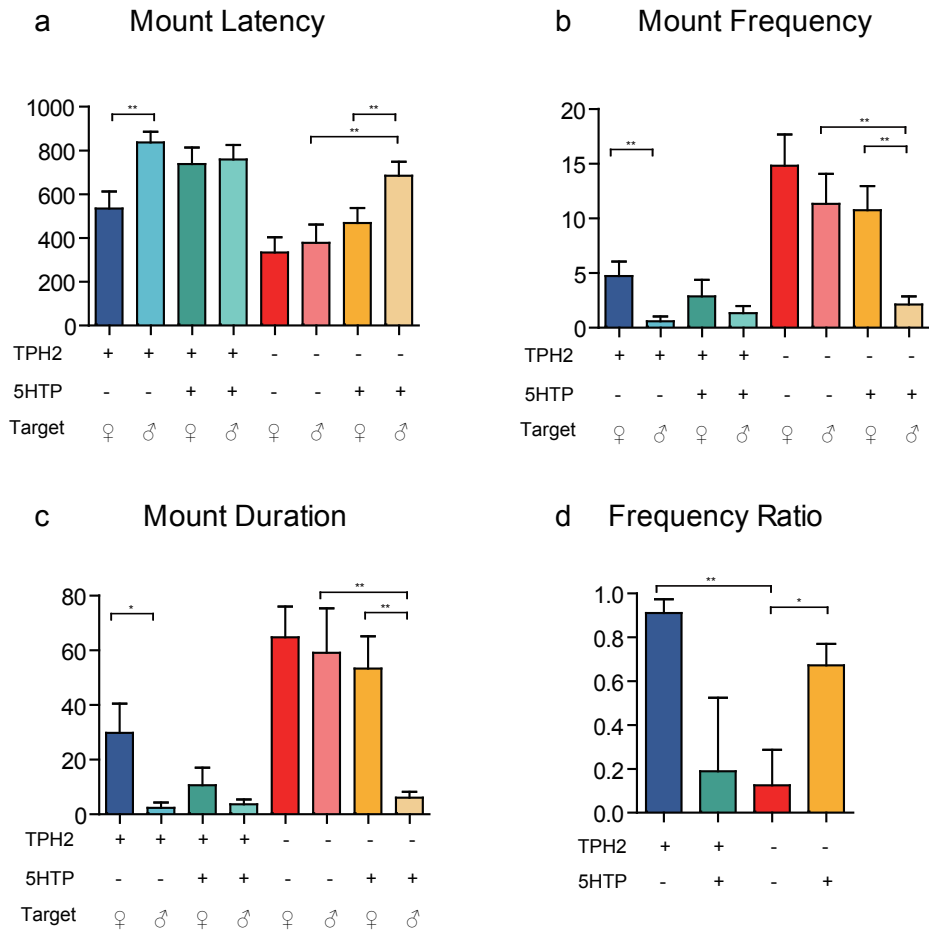

**Supplementary Figure 10 | Effect of 5-HTP on mating choice.** *Tph2*<sup>+/+</sup> and *Tph2*<sup>-/-</sup> males treated with 5-HTP or saline were tested for mating choice with two adult mice, one male and one estrous female. n=15 for *Tph2*<sup>+/+</sup> and n=16 for *Tph2*<sup>-/-</sup>. 5-HTP significantly rescued the mating choice phenotype of *Tph2*<sup>-/-</sup> mutant males in mounting latency (**a**, p<0.01, t test), frequency (**b**, p<0.01, t test), duration (**c**, p<0.01, t test), and the frequency ratio (**d**, p<0.05, t test).

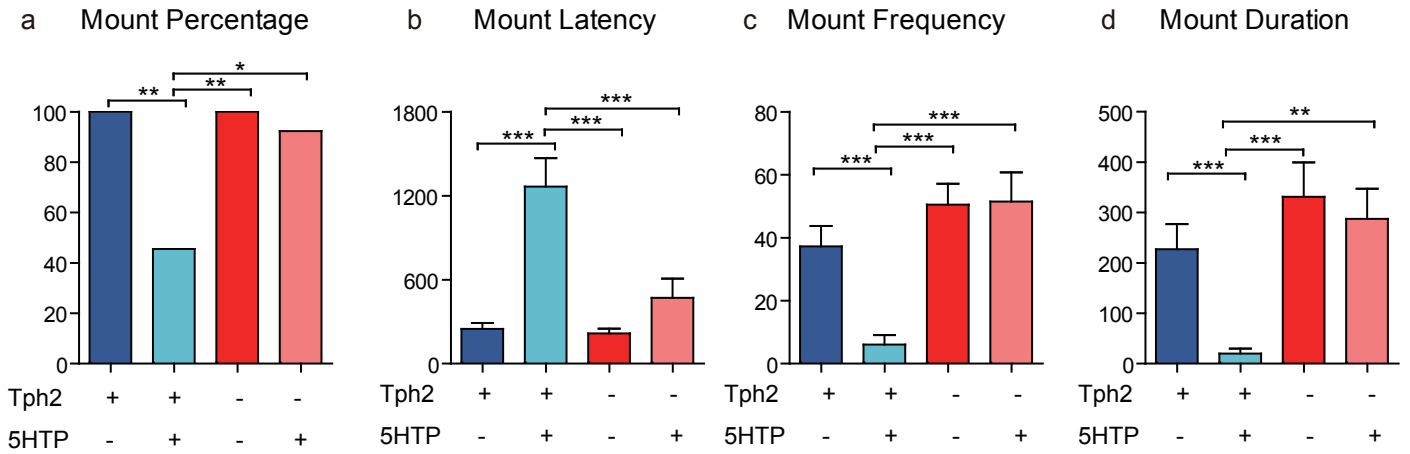

**Supplementary Figure 11 | Effect of 5-HTP on male-female mounting.** *Tph2*<sup>+/+</sup> and *Tph2*<sup>-/-</sup> males treated with 5-HTP or saline were tested with estrous C57 females. n=11 for *Tph2*<sup>+/+</sup> and n=13 for *Tph2*<sup>-/-</sup>. 5-HTP did not change male-female mounting of *Tph2*<sup>-/-</sup> males, but increased the male-female mount latency (a, p<0.001, t test), decreased the mounting frequency (b, p<0.01, t test) and duration (c, p<0.01, t test) of *Tph2*<sup>+/+</sup>.

### Supplementary Data Set 1

Statistics for all regular figures. Because of space constraints, statistics and number of animals tested were omitted from the text and the figure legends. They are listed here.

In Figure 1 a-d, n=9 for *ePet1-Cre*, n=11 for *Lmx1b<sup>+/+</sup>*, n=13 for *Lmx1b<sup>+/-</sup>*, n=14 for *Lmx1b<sup>-/-</sup>*. a, p<0.001 when *Lmx1b<sup>-/-</sup>* was compared with *Lmx1b<sup>+/+</sup>*, *Lmx1b<sup>+/-</sup>* or *ePet1-Cre*; p>0.05 for other comparisons (X<sup>2</sup> test). b, p<0.001 (one-way ANOVA) when *Lmx1b<sup>-/-</sup>* were compared with *Lmx1b<sup>+/+</sup>*, *Lmx1b<sup>+/-</sup>* or *ePet1-Cre*. c, p<0.001 when *Lmx1b<sup>-/-</sup>* was compared with *Lmx1b<sup>+/+</sup>*, *Lmx1b<sup>+/-</sup>* or *ePet1-Cre*; p>0.05 for other comparisons (one-way ANOVA). d, p<0.001 (one-way ANOVA) when *Lmx1b<sup>-/-</sup>* were compared with *Lmx1b<sup>+/+</sup>*, *Lmx1b<sup>+/-</sup>* or *ePet1-Cre*. e-f, n=9 for *ePet1-Cre*, n=14 for *Lmx1b<sup>+/+</sup>*, n=16 for *Lmx1b<sup>+/-</sup>*, n=14 for *Lmx1b<sup>-/-</sup>*. f, USV towards females were similar among males of *ePet1-Cre*, *Lmx1b<sup>-/-</sup>*, *Lmx1b<sup>+/+</sup>*, or *Lmx1b<sup>+/-</sup>* (p>0.05, X<sup>2</sup> test). USV towards male intruders were higher from *Lmx1b<sup>-/-</sup>* males than from *ePet1-Cre*, *Lmx1b<sup>+/+</sup>* or *Lmx1b<sup>+/-</sup>* males (p<0.05, X<sup>2</sup> Test). g, USVs towards males were higher from *Lmx1b<sup>-/-</sup>* males than those from *ePet1-Cre*, *Lmx1b<sup>+/+</sup>* or *Lmx1b<sup>+/-</sup>* males (p<0.05, one-way ANOVA), whereas there is no statistically significant difference among *ePet1-Cre*, *Lmx1b<sup>+/+</sup>*, *Lmx1b<sup>+/-</sup>* and *Lmx1b<sup>-/-</sup>* males in their USVs towards females (p>0.05, one-way ANOVA).

In Figure 2, n=9 for *ePet1-Cre*, n=14 for *Lmx1b<sup>+/+</sup>*, n=10 for *Lmx1b<sup>+/-</sup>* and n=11 for *Lmx1b<sup>-/-</sup>*. a, a higher percentage of *ePet1-Cre*, *Lmx1b<sup>+/+</sup>* and *Lmx1b<sup>+/-</sup>* mice mounted female than male targets (p<0.05, X<sup>2</sup> test). A similar percentage of *Lmx1b<sup>-/-</sup>* males mounted females and males (p>0.05, X<sup>2</sup> test). b, *ePet1-Cre*, *Lmx1b<sup>+/+</sup>* and

*Lmx1b*<sup>+/-</sup> males mounted female targets faster than male targets (p<0.05 for *ePet1-Cre*, p<0.05 for *Lmx1b*<sup>+/+</sup>, p<0.01 for *Lmx1b*<sup>+/-</sup>, t test). Mounting latencies of *Lmx1b*<sup>-/-</sup> males for females and males were not significantly different (p>0.05, t test). c, p<0.05 for *ePet1-Cre* vs. *Lmx1b*<sup>-/-</sup>, p<0.05 for *Lmx1b*<sup>+/+</sup> vs. *Lmx1b*<sup>-/-</sup>; p<0.05 for *Lmx1b*<sup>+/-</sup> vs. *Lmx1b*<sup>-/-</sup>, p>0.05 for *Lmx1b*<sup>+/+</sup> vs. *Lmx1b*<sup>+/-</sup> (X<sup>2</sup> test). d, *ePet1-Cre* males mounted females significantly more often than males (p<0.01, t test), as did *Lmx1b*<sup>+/+</sup> (p<0.01, t test) and *Lmx1b*<sup>+/-</sup> males (p<0.05, t test). *Lmx1b*<sup>-/-</sup> males mounted females as often as males (p>0.05, t test). e, *ePet1-Cre* males spent more time mounting females than males (p<0.01, t test), as did *Lmx1b*<sup>+/+</sup> (p<0.01, t test) and *Lmx1b*<sup>+/-</sup> males (p<0.05, t test). *Lmx1b*<sup>-/-</sup> males did not show differences in mounting males or females (p>0.05, t test). f, The mounting frequency ratio of *Lmx1b*<sup>-/-</sup> was different from those of *ePet1-Cre*, *Lmx1b*<sup>+/+</sup> and *Lmx1b*<sup>+/-</sup> (p<0.01, one-way ANOVA)

In Figure 3 a-c, n=16 for *Lmx1b*<sup>+/+</sup>, n=12 for *Lmx1b*<sup>+/-</sup>, n=16 for *Lmx1b*<sup>-/-</sup>. In d-f, n=9 for *ePet1-Cre*, n=16 for *Lmx1b*<sup>+/+</sup>, n=8 for *Lmx1b*<sup>+/-</sup> and n=17 for *Lmx1b*<sup>-/-</sup>. a, *Lmx1b*<sup>+/+</sup> males spent more time sniffing female than male genital odor (p<0.001, t test) as did *Lmx1b*<sup>+/-</sup> males (p<0.01, t test). *Lmx1b*<sup>-/-</sup> males spent a similar amount of time on female and male genital odor (p>0.05, t test). Three groups were not significantly different in male genital odor sniffing time (p>0.05, one-way ANOVA) but *Lmx1b*<sup>-/-</sup> males spent less time in sniffing female genital odor than the other 2 groups (p<0.01 for *Lmx1b*<sup>+/+</sup> vs. *Lmx1b*<sup>-/-</sup>, p<0.01 for *Lmx1b*<sup>+/-</sup> vs. *Lmx1b*<sup>-/-</sup>, one-way ANOVA). b, Sniffing ratio was calculated from (time on female side minus time on male side)/total sniffing time of each mouse. *Lmx1b*<sup>-/-</sup> males were significantly

different from  $Lmx1b^{+/+}$  and  $Lmx1b^{-/-}$  males ( $p < 0.05$  for  $Lmx1b^{+/+}$  vs.  $Lmx1b^{-/-}$ ,  $p < 0.05$  for  $Lmx1b^{+/-}$  vs.  $Lmx1b^{-/-}$ ,  $p > 0.05$  for  $Lmx1b^{+/+}$  vs.  $Lmx1b^{+/-}$ , one-way ANOVA). c,  $p < 0.001$  for  $Lmx1b^{+/+}$  vs.  $Lmx1b^{-/-}$ ,  $p < 0.05$  for  $Lmx1b^{+/-}$  vs.  $Lmx1b^{-/-}$ ,  $p > 0.05$  for  $Lmx1b^{+/+}$  vs.  $Lmx1b^{+/-}$  ( $X^2$  test). d,  $ePet1-Cre$  males spent more time above female bedding than male bedding ( $p < 0.001$ , t test) as did  $Lmx1b^{+/+}$  ( $p < 0.001$ , t test) and  $Lmx1b^{+/-}$  males ( $p < 0.01$ , t test).  $Lmx1b^{-/-}$  males spent a similar amount of time above female and male bedding ( $p > 0.05$ , t test). Compared with  $ePet1-Cre$  and  $Lmx1b^{+/+}$ ,  $Lmx1b^{-/-}$  males spent less time above female bedding ( $p < 0.01$  for  $ePet1-Cre$  vs.  $Lmx1b^{-/-}$ ,  $p < 0.05$  for  $Lmx1b^{+/+}$  vs.  $Lmx1b^{-/-}$ , one-way ANOVA) but more time above male bedding ( $p < 0.01$ , one-way ANOVA). e, The bedding time ratio (female-male bedding)/total time on bedding of  $Lmx1b^{-/-}$  was different from  $ePet1-Cre$  ( $p < 0.01$ , one-way ANOVA) and  $Lmx1b^{+/+}$  ( $p < 0.01$ , one-way ANOVA). f, Compared with  $ePet1-Cre$ ,  $Lmx1b^{+/+}$  and  $Lmx1b^{+/-}$ , a significantly higher percentage of  $Lmx1b^{-/-}$  males spent more time above male bedding ( $p < 0.001$  for  $ePet1-Cre$  vs.  $Lmx1b^{-/-}$ ,  $p < 0.001$  for  $Lmx1b^{+/+}$  vs.  $Lmx1b^{-/-}$ ,  $p < 0.05$  for  $Lmx1b^{+/-}$  vs.  $Lmx1b^{-/-}$ ,  $X^2$  test).

In Figure 4, a, both  $Lmx1b^{+/+}$  and  $Lmx1b^{-/-}$  males showed habituation in sniffing time to ovariectomized females presented repeatedly ( $p < 0.001$  for 1<sup>st</sup> vs 4<sup>th</sup> tests by both  $Lmx1b^{+/+}$  and  $Lmx1b^{-/-}$ , one-way ANOVA). Dishabituation was observed for both  $Lmx1b^{+/+}$  and  $Lmx1b^{-/-}$  when new ovariectomized females were introduced (4<sup>th</sup> vs 5<sup>th</sup>  $p < 0.01$  for both  $Lmx1b^{+/+}$  and  $Lmx1b^{-/-}$ , one-way ANOVA). No statistic difference was found between  $Lmx1b^{+/+}$  and  $Lmx1b^{-/-}$  males at any point ( $p > 0.05$ , t test;  $n = 23$  for

*Lmx1b*<sup>+/+</sup>, n=22 for *Lmx1b*<sup>-/-</sup>). b, After 7 training sessions with male and female urine, *Lmx1b*<sup>+/+</sup> males increased their correct rate from 43.1±1.8% to 84.8±4.0%, while *Lmx1b*<sup>-/-</sup> males from 37.6±2.7% to 86.4±3.3%. No significant difference was detected between *Lmx1b*<sup>+/+</sup> and *Lmx1b*<sup>-/-</sup> males at any point (p>0.05, t test; n=14 for *Lmx1b*<sup>+/+</sup>, n=14 for *Lmx1b*<sup>-/-</sup>).

In Figure 5, a-b, Male-male mounting behavior of *Tph2*<sup>+/+</sup> (n=10), *Tph2*<sup>+/-</sup> (n=10) and *Tph2*<sup>-/-</sup> (n=11) mice. Compared with *Tph2*<sup>+/+</sup> and *Tph2*<sup>+/-</sup>, *Tph2*<sup>-/-</sup> males showed a shorter latency (p<0.05 for both *Tph2*<sup>+/+</sup> vs. *Tph2*<sup>-/-</sup> and *Tph2*<sup>+/-</sup> vs. *Tph2*<sup>-/-</sup>), and higher frequency (p<0.05 for both *Tph2*<sup>+/+</sup> vs. *Tph2*<sup>-/-</sup> and *Tph2*<sup>+/-</sup> vs. *Tph2*<sup>-/-</sup> one-way ANOVA) in mounting males. c, Both *Tph2*<sup>+/+</sup> (n=22) and *Tph2*<sup>+/-</sup> (n=17) males significantly preferred female over male bedding (p<0.01, t test), whereas *Tph2*<sup>-/-</sup> (n=20) males did not show preference between male and female bedding (p>0.05, t test). d, Both *Tph2*<sup>+/+</sup> and *Tph2*<sup>+/-</sup> males significantly preferred female over male genital odor (p<0.001 for *Tph2*<sup>+/+</sup>, p<0.01 for *Tph2*<sup>+/-</sup>, t test), whereas *Tph2*<sup>-/-</sup> males did not show preference between male and female genital odor (p>0.05, t test).

In Figure 6, a, n=5 for *Tph2*<sup>+/+</sup> with saline, n=5 for *Tph2*<sup>-/-</sup> with saline, n=5 for *Tph2*<sup>+/+</sup> with 5-HTP, and n=6 for *Tph2*<sup>-/-</sup> with 5-HTP). b-c, n=13 for *Tph2*<sup>+/+</sup> with saline, n=12 for *Tph2*<sup>-/-</sup> with saline, n=13 for *Tph2*<sup>+/+</sup> with 5-HTP, and n=12 for *Tph2*<sup>-/-</sup> with 5-HTP. Male-male mounting in *Tph2*<sup>-/-</sup> mice monitored between 20 and 50 min after injection was significantly rescued by 5-HTP: the latency was lengthened (p<0.01) and frequency reduced (p<0.01). The mounting latency of *Tph2*<sup>-/-</sup> mice with 5-HTP injection was not significantly different from those of *Tph2*<sup>+/+</sup> (with saline or

with 5-HTP,  $p > 0.1$ ). The mounting frequency of *Tph2*<sup>-/-</sup> mice with 5-HTP injection was not significantly different from those of *Tph2*<sup>+/+</sup> (with saline or with 5-HTP,  $p > 0.05$ ). d, Bedding preference was monitored between 35 and 40 min after injection. 5-HTP could significantly restore the preference of female over male bedding by *Tph2*<sup>-/-</sup> males.
